# Supplementary material
Source: PubMed Central journal article supplement (PMC9720889)
Supplement: NIHMS1828712-supplement-4.pdf [file NIHMS1828712-supplement-4.pdf]

**Figure S1****A**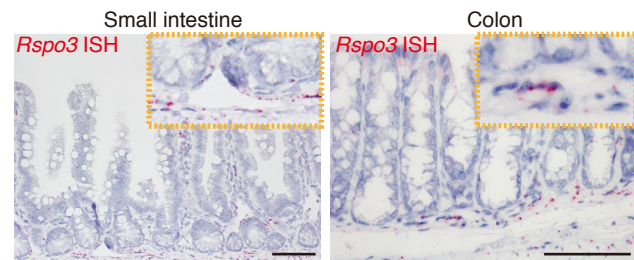**B**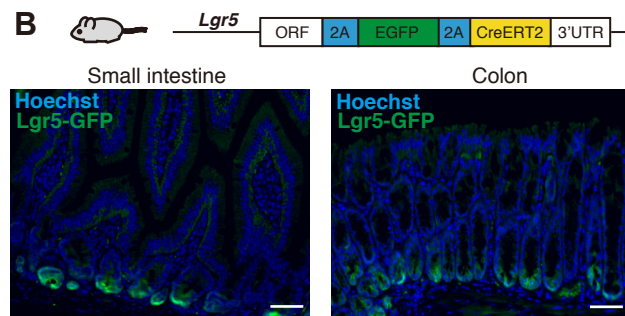**C**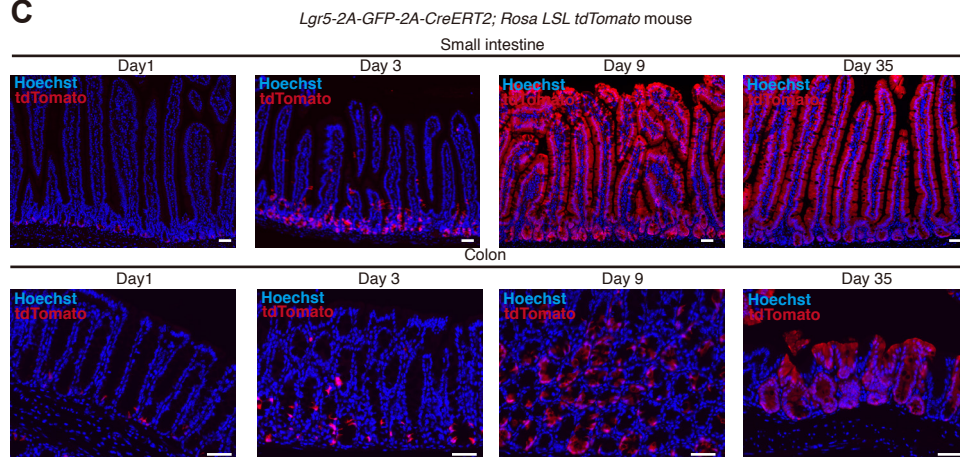**D**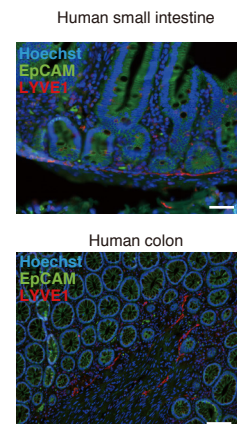**E**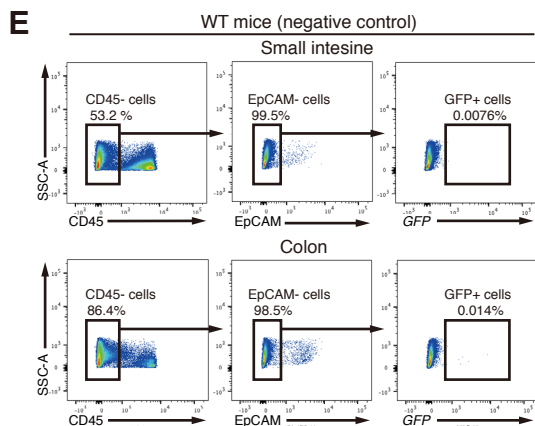**F**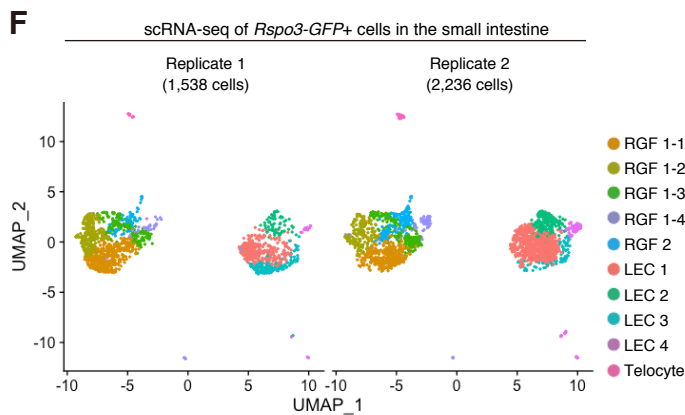**G**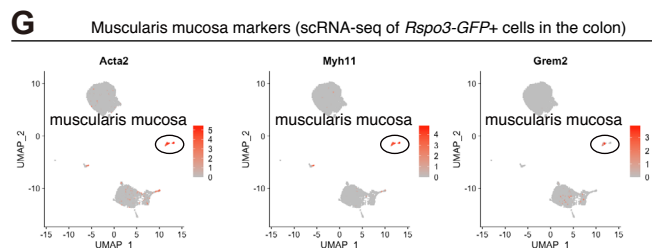

**Figure S1. RSPO3+ LECs reside near Lgr5+ ISCs, Related to Figure 1 and Figure 2**

(A) *Rspo3* mRNA expression in the small intestine and colon by ISH.

(B) Schematic (top) of new *Lgr5-2A-GFP-2A-CreERT2* mice. Immunofluorescence (IF) shows that *Lgr5-GFP* is expressed in nearly all the crypts of both the small intestine and colon. The image represents one of 6 biological replicates.

(C) Lineage tracing using *Lgr5-2A-GFP-2A-CreERT2; Rosa-LSL-tdTomato* mice reveals that *Lgr5-GFP*<sup>+</sup> cells self-renew for the long-term and give rise to differentiated progeny cells of the small intestine and colon. The image represents one of 3 biological replicates.

(D) IF for LYVE1 and EpCAM in the human small intestine and colon. Related to Figure 1D.

(E) Control (mouse without *Rspo3-GFP*) FACS plot to show that GFP<sup>+</sup> cells of the *Rspo3-GFP* mice in Figure 1E are not detected in control mice. Related to Figure 1E.

(F) Individual UMAP plots for each replicate of scRNA-seq of the small intestinal *Rspo3-GFP*<sup>+</sup> stromal cells demonstrate the consistent clustering patterns among the replicates. Related to Figure 2A.

(G) Relative expression of *Acta2*, *Myh11*, and *Grem2* (muscularis mucosa cell marker genes), and *Pdgfra* (negative marker for muscularis mucosa cells) onto the UMAP plot of scRNA-seq of colonic *Rspo3-GFP*<sup>+</sup> cells. Related to Figure 2E.

Scale bar, 50  $\mu$ m (A, B, C, D).

# Figure S2

## A Stromal cells in the mouse small intestine (McCarthy et al., 2020, reanalysis)

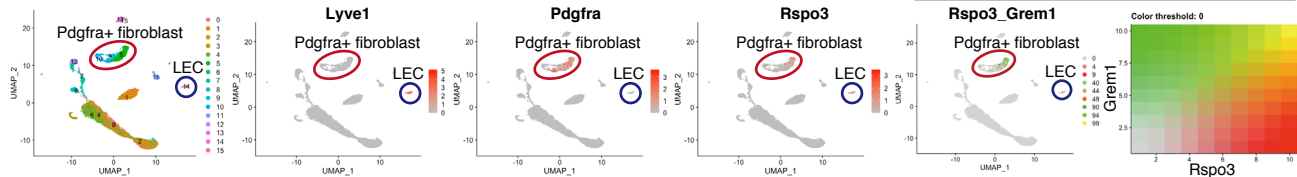

## B Stromal cells in the mouse colon (Kinchen et al., 2018, reanalysis)

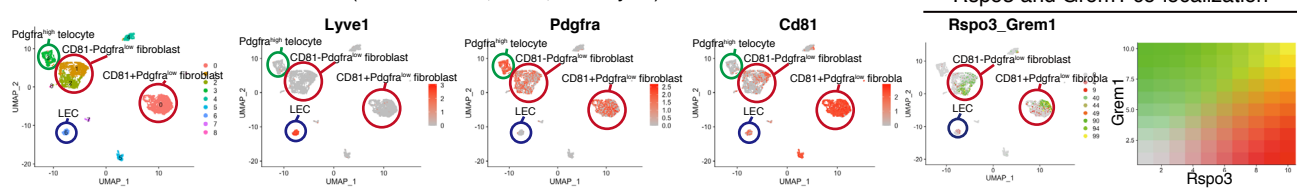

## C Pdgfra<sup>+</sup> cells in the mouse small intestine (McCarthy et al., 2020, reanalysis)

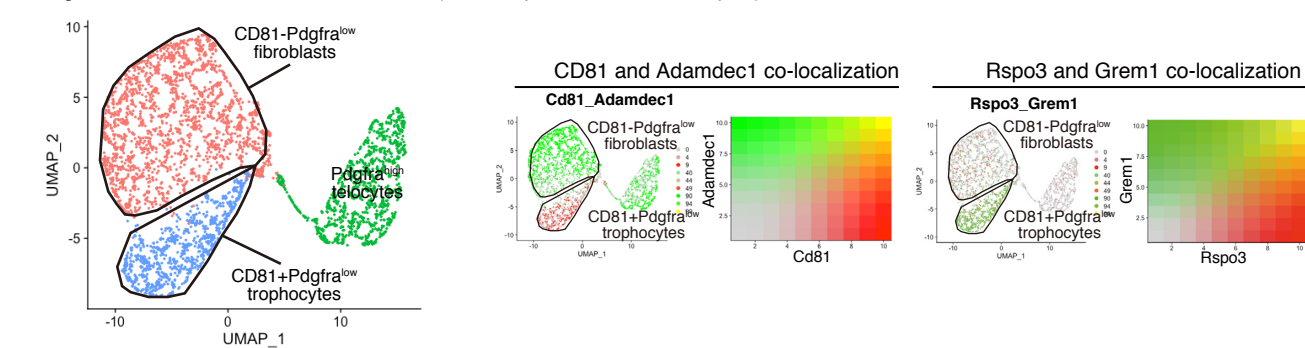

## D Pdgfra<sup>+</sup> cells in the mouse colon (Brugger et al., 2020, reanalysis)

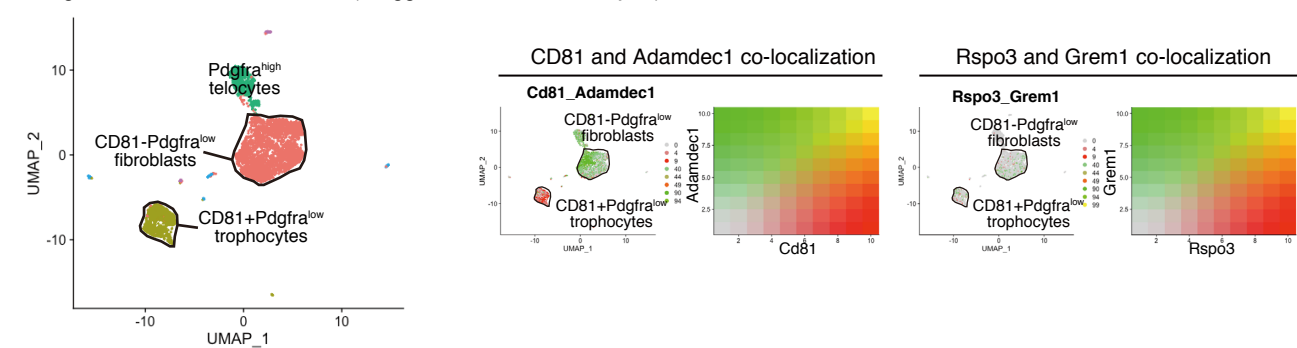

## E Stromal cells in the human colon (Kinchen et al., 2018, reanalysis)

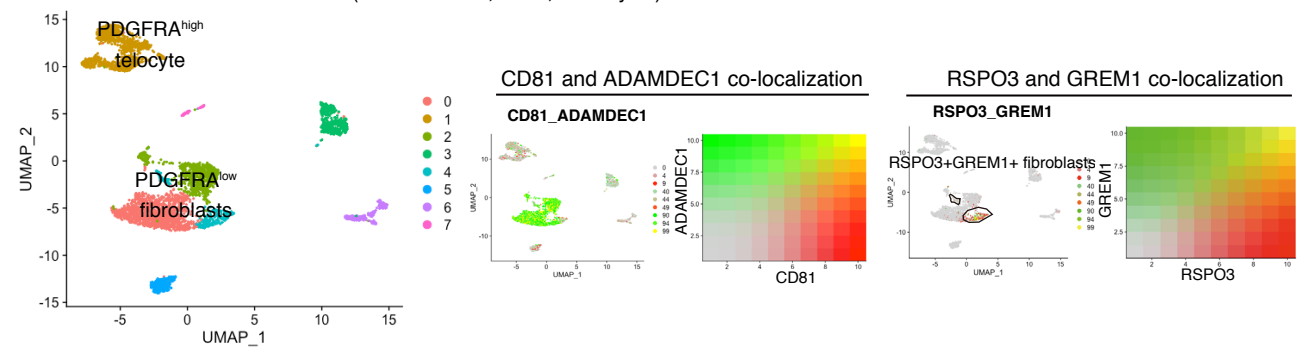

**Figure S2. RSPO3 expression in the small intestinal and colonic stromal cells (reanalysis of public datasets). Related to Figure 1 and Figure 2**

(A) Uniform manifold approximation and projection (UMAP) of scRNA-seq of small intestinal stromal cells (McCarthy et al., 2020, reanalysis). *Rspo3* is expressed by *Lyve1*<sup>+</sup> LEC cluster and by a subset of *Pdgfra*<sup>+</sup> fibroblast cluster. *Rspo3*<sup>+</sup> cells in the *Pdgfra*<sup>+</sup> fibroblasts cluster co-express *Grem1*.

(B) UMAP of scRNA-seq of colonic stromal cells (Kinchen et al., 2018, reanalysis). *Rspo3* is expressed by *Lyve1*<sup>+</sup> LEC cluster and by a subset of *Pdgfra*<sup>low</sup> fibroblasts (both *Cd81*-*Pdgfra*<sup>low</sup> fibroblasts and *Cd81*+*Pdgfra*<sup>low</sup> fibroblasts). A subset of *Rspo3*<sup>+</sup> cells in the *Pdgfra*<sup>low</sup> fibroblast clusters co-express *Grem1*.

(C) UMAP of scRNA-seq of small intestinal *Pdgfra*<sup>+</sup> cells (McCarthy et al., 2020, reanalysis). The expressions of *Cd81* and *Adamdec1* are mutually exclusive. *Rspo3*<sup>+</sup> cells are detected both in the *Cd81*<sup>+</sup>*Adamdec1*<sup>-</sup>*Pdgfra*<sup>low</sup> trophocyte and *Cd81*<sup>-</sup>*Adamdec1*<sup>+</sup>*Pdgfra*<sup>low</sup> fibroblast clusters, and these *Rspo3*<sup>+</sup> cells frequently co-express *Grem1*.

(D) UMAP of scRNA-seq of colonic *Pdgfra*<sup>+</sup> cells (Brugger et al., 2020, reanalysis). The expressions of *Cd81* and *Adamdec1* are mutually exclusive. *Rspo3*<sup>+</sup> cells are detected both in the *Cd81*<sup>+</sup>*Adamdec1*<sup>-</sup>*Pdgfra*<sup>low</sup> trophocyte and *Cd81*<sup>-</sup>*Adamdec1*<sup>+</sup>*Pdgfra*<sup>low</sup> fibroblast clusters, and these *Rspo3*<sup>+</sup> cells frequently co-express *Grem1*.

(E) UMAP of scRNA-seq of human colonic stromal cells (Kinchen et al., 2018, reanalysis). The expressions of *CD81* and *ADAMDEC1* are ubiquitous in *PDGFRA*<sup>low</sup> fibroblasts and not mutually exclusive. *RSPO3*<sup>+</sup>*GREM1*<sup>+</sup> cells are detected in a subset of *PDGFRA*<sup>low</sup> fibroblasts.

**Figure S3**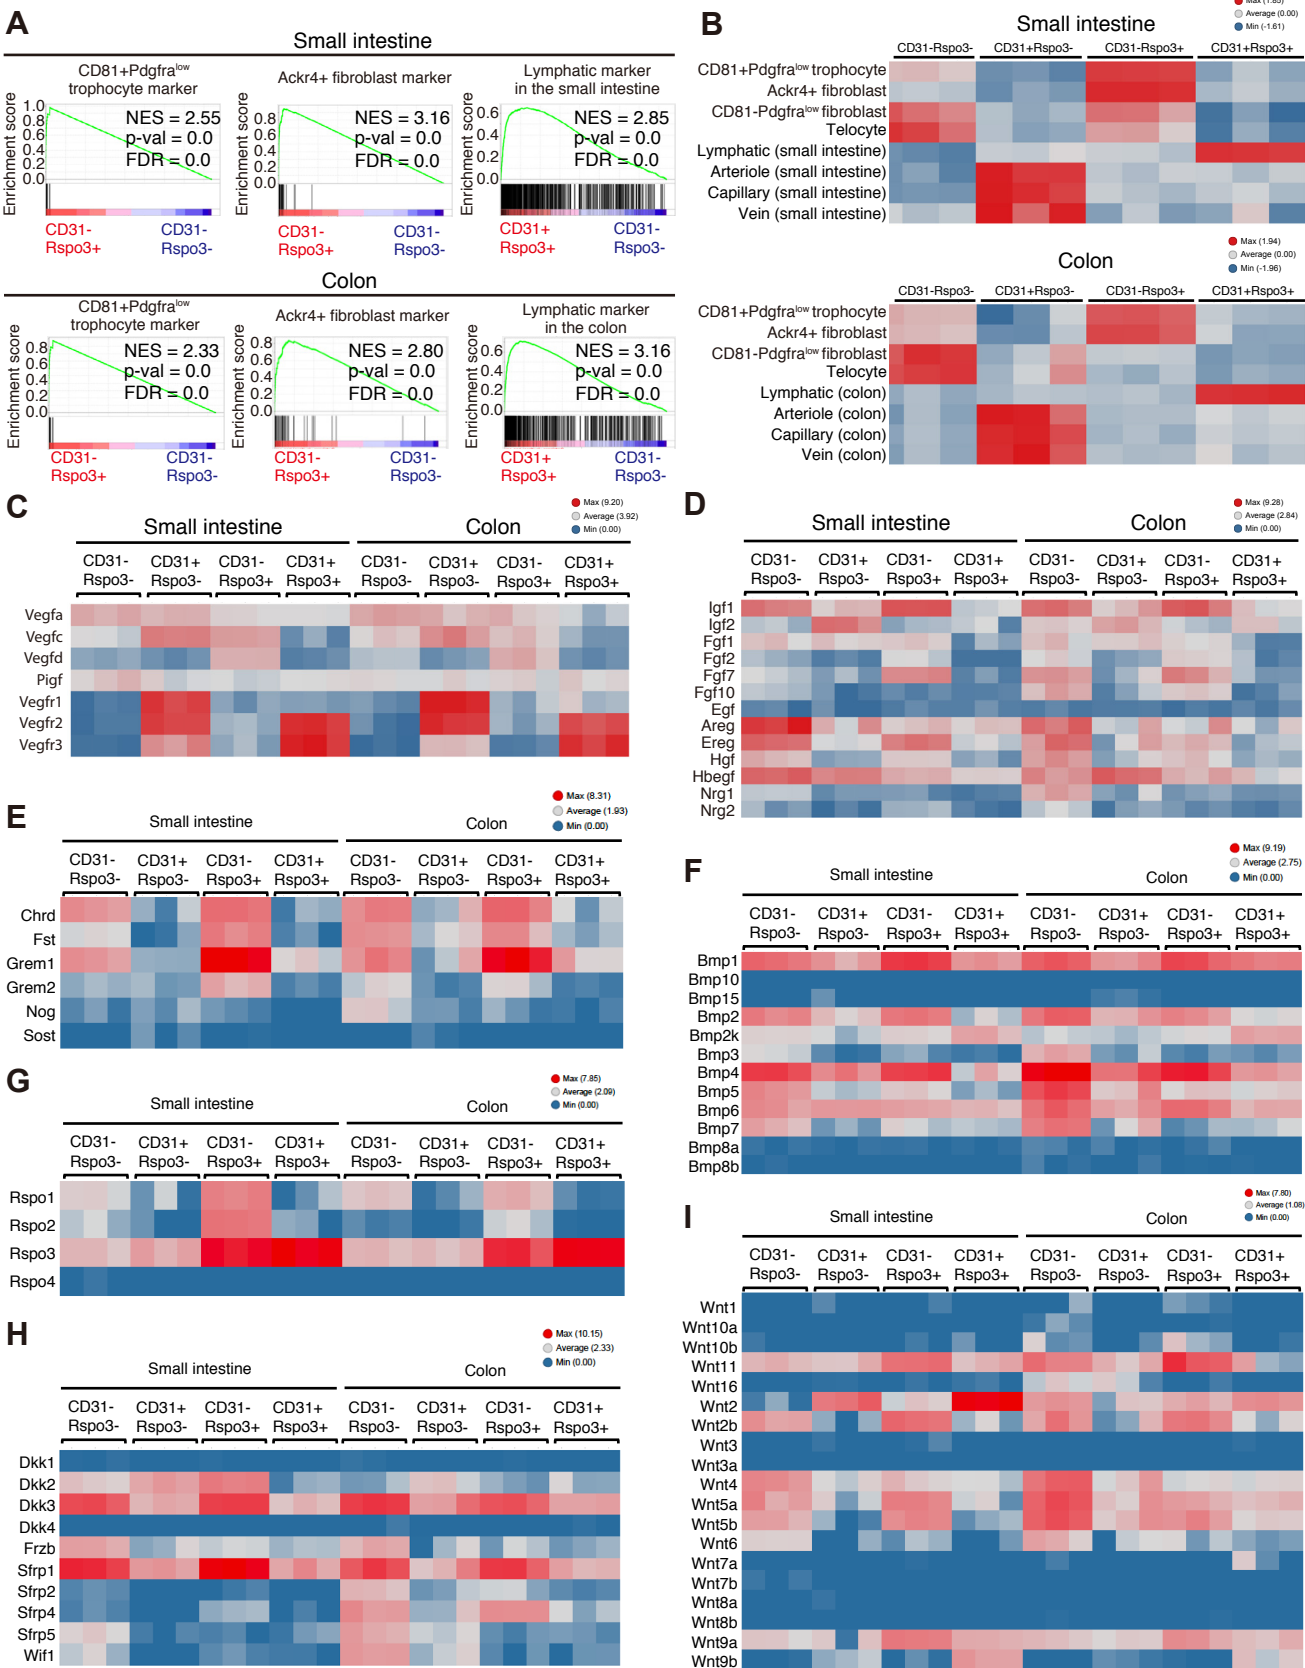

**Figure S3. RNA-seq on CD31-Rspo3-GFP-, CD31+Rspo3-GFP-, CD31-Rspo3-GFP+, and CD31+Rspo3-GFP+ cells, Related to Figure 3**

(A) GSEA of CD81+Pdgfra<sup>low</sup> trophocyte markers, Ackr4+ fibroblast markers, and lymphatic markers. FDR, false-discovery rate; NES, normalized enrichment score.

(B) The heatmap of single sample GSEA (ssGSEA).

(C-I) The heatmap of gene expressions for angiogenic factors (C), growth factors (D), BMPi (E), BMP (F), RSPO (G), WNT antagonist (H), and WNT (I) using RNA-seq on CD31-*Rspo3-GFP*-, CD31+*Rspo3-GFP*-, CD31-*Rspo3-GFP*+, and CD31+*Rspo3-GFP*+ cells from the small intestine and colon.

n = 3 mice per group.

# Figure S4

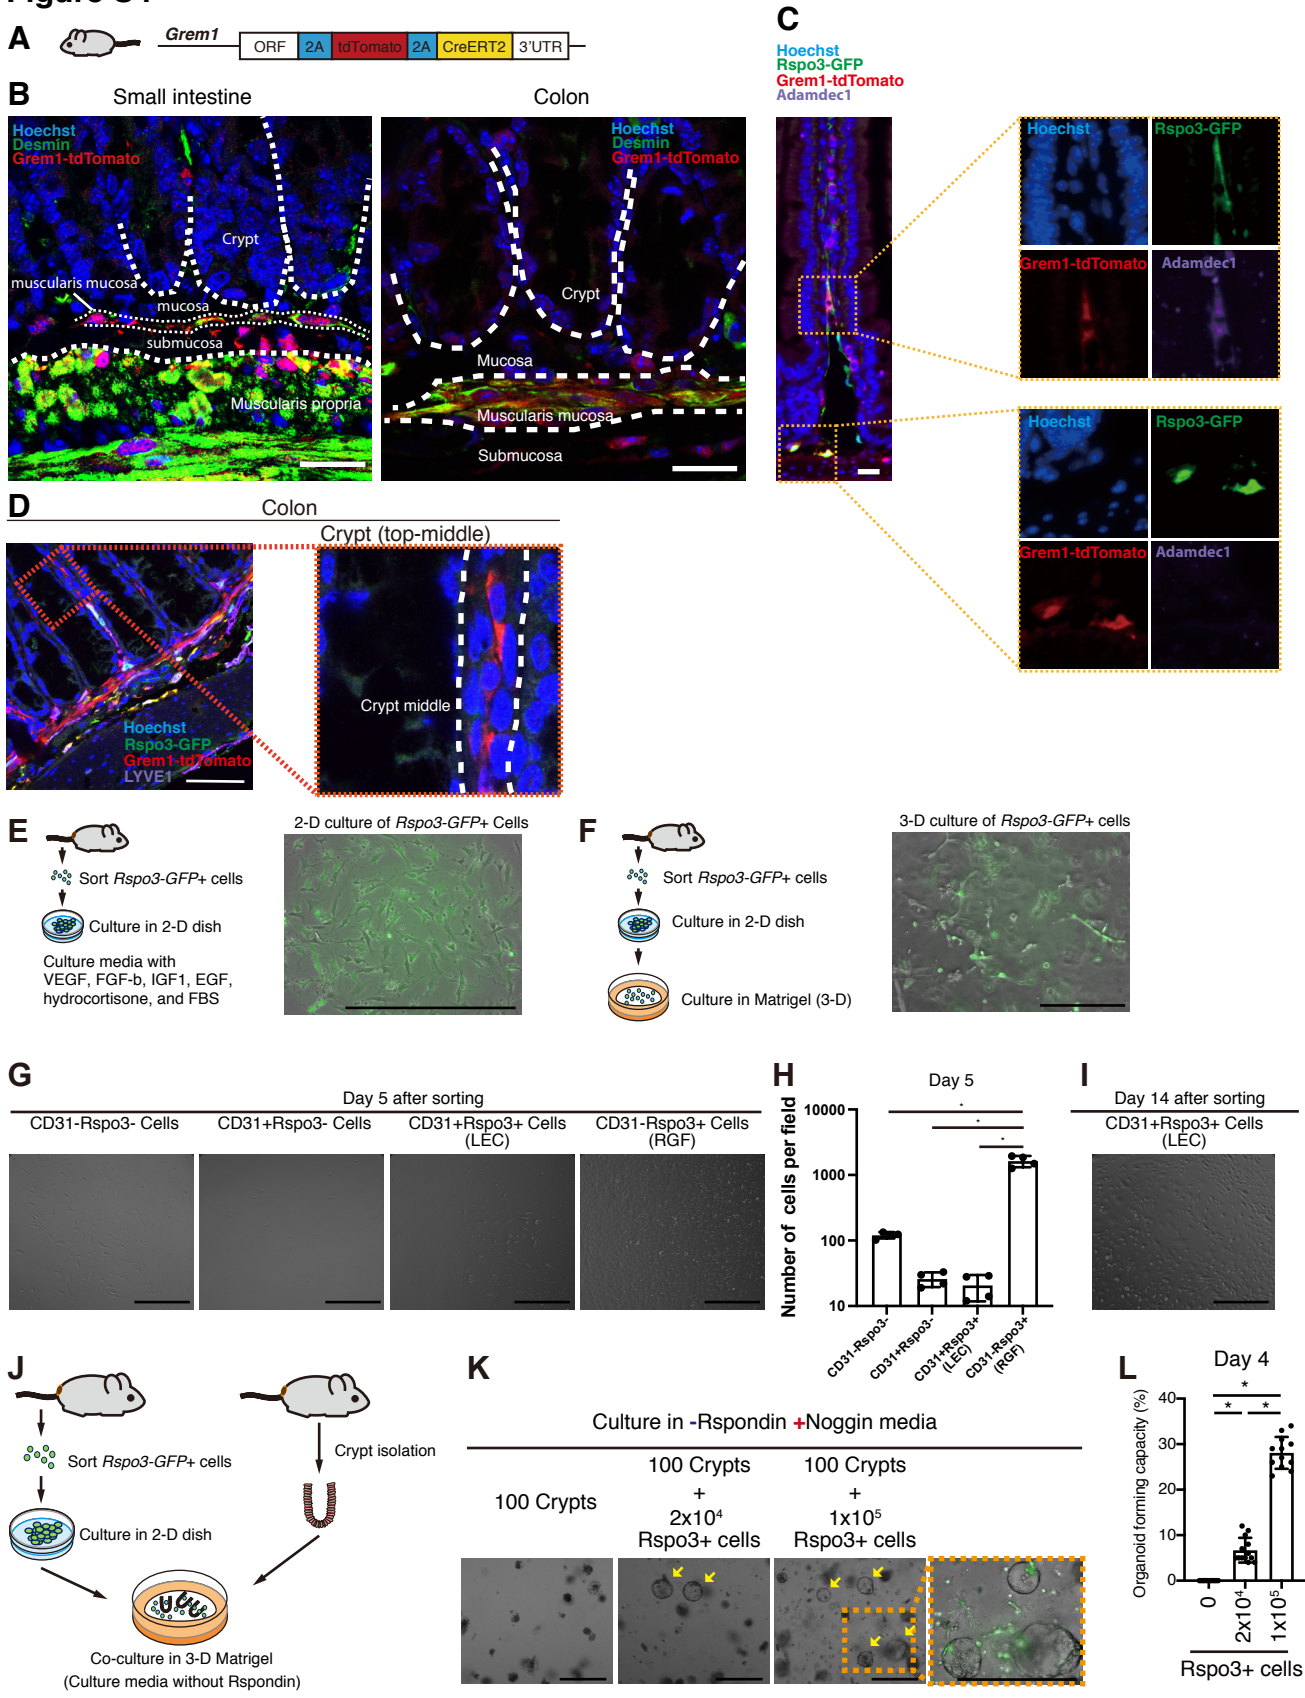

**Figure S4. Expression pattern of GREM1 and RSPO3 and establishment of RSPO3+ stromal cell culture, Related to Figure 3 and Figure 4**

(A) Schematic of *Grem1-tdTomato-CreERT2* mouse.

(B) Confocal microscopy of immunofluorescence (IF) for *Grem1-tdTomato* and Desmin, showing that *Grem1-tdTomato* is expressed by a subset of lamina propria and submucosal stromal cells, but is also strongly expressed by Desmin+ muscularis propria and muscularis mucosa cells.

(C) IF for *Rspo3-GFP*, *Grem1-tdTomato*, and Adamdec1 reveals that RGFs that are close to the crypt bottoms do not express Adamdec1 whereas RGFs infrequently detected in the villus core next to lacteals co-express Adamdec1.

(D) GREM1+RSPO3- cells at the middle-top zone of colonic crypts. lower magnification image is adapted from Figure 3E.

(E-F) 2-D (E) and 3-D (F) culture of sorted *Rspo3-GFP+* stromal cells from the small intestine.

(G-H) Images (G) and quantification (H) of 2-D culture of sorted CD31<sup>-</sup>*Rspo3-GFP*<sup>+</sup>, CD31<sup>+</sup>*Rspo3-GFP*<sup>+</sup>, CD31<sup>+</sup>*Rspo3-GFP*<sup>-</sup>, and CD31<sup>-</sup>*Rspo3-GFP*<sup>-</sup> cells from the small intestine at day 5.

(I) Image of 2-D culture of CD31<sup>+</sup>*Rspo3-GFP*<sup>+</sup> cells (LECs) from the small intestine at day 14 shows the stable expansion of LECs.

(J) Schematic of heterotypic co-culture of RSPO3+ stromal cells and the intestinal epithelial crypts.

(K-L) Representative images (K) and quantification (L) of co-culture of small intestinal RSPO3+ stromal cells (0, 2x10<sup>4</sup>, 1x10<sup>5</sup>) and the crypts in the culture media supplemented with Noggin, but not with RSPO. n = 12 - 13 from 3 mice per group. Arrows indicate organoid formation.

One-way analysis of variance (ANOVA) with post-hoc Tukey's multiple comparison (H, L). Data are mean ± SD.

\*p < 0.05. Scale bar, 20 μm (B, C, E, F, G, I, K), 50 μm (D).





**Figure S5. Niche RSPO3 loss reduces WNT signaling and proliferation in the crypt, Related to Figure 5.**

(A-G) Comprehensive histochemical and immunohistochemical/fluorescence analyses in the small intestine and colon after inducing RSPO3 loss in LECs, RGFs, or both. Immunohistochemistry for Ki67 (A) and Lysozyme (B); PAS staining (C); ISH for *Rspo3* (D), *Axin2* (E), and *Ascl2* (F). Quantification of Ki67+ cells (per crypt), Lysozyme+ cells (per crypt), and goblet cells (percentage in the epithelial cells) (G) (n = 50 from 6 mice per group).

(H) Porcupine inhibitor LGK974 was administered (daily oral gavage, 5 mg/kg) to the mice after RSPO3 deletion. Whereas control mice or the mice with partial RSPO3 stromal loss (i.e., *Grem1-CreERT2; Rspo3 f/f* mice or *Prox1-CreERT2; Rspo3 f/f* mice) did not show any architectural changes, mice with complete RSPO3 stromal loss (i.e., *Grem1-CreERT2; Prox1-CreERT2; Rspo3 f/f* mice) illustrated significant crypt degeneration/drop-out in the intestines on day 8 of treatment. The image represents one of 4 biological replicates per group.

One-way analysis of variance (ANOVA) with post-hoc Tukey's multiple comparison (G). For box-and-whisker plots (G), data were expressed as box-and-whisker from the minimum to the maximum. \*p < 0.05. N.S. not significant.

Scale bar, 20  $\mu$ m (A, B, C, D, E, F, H).

**Figure S6**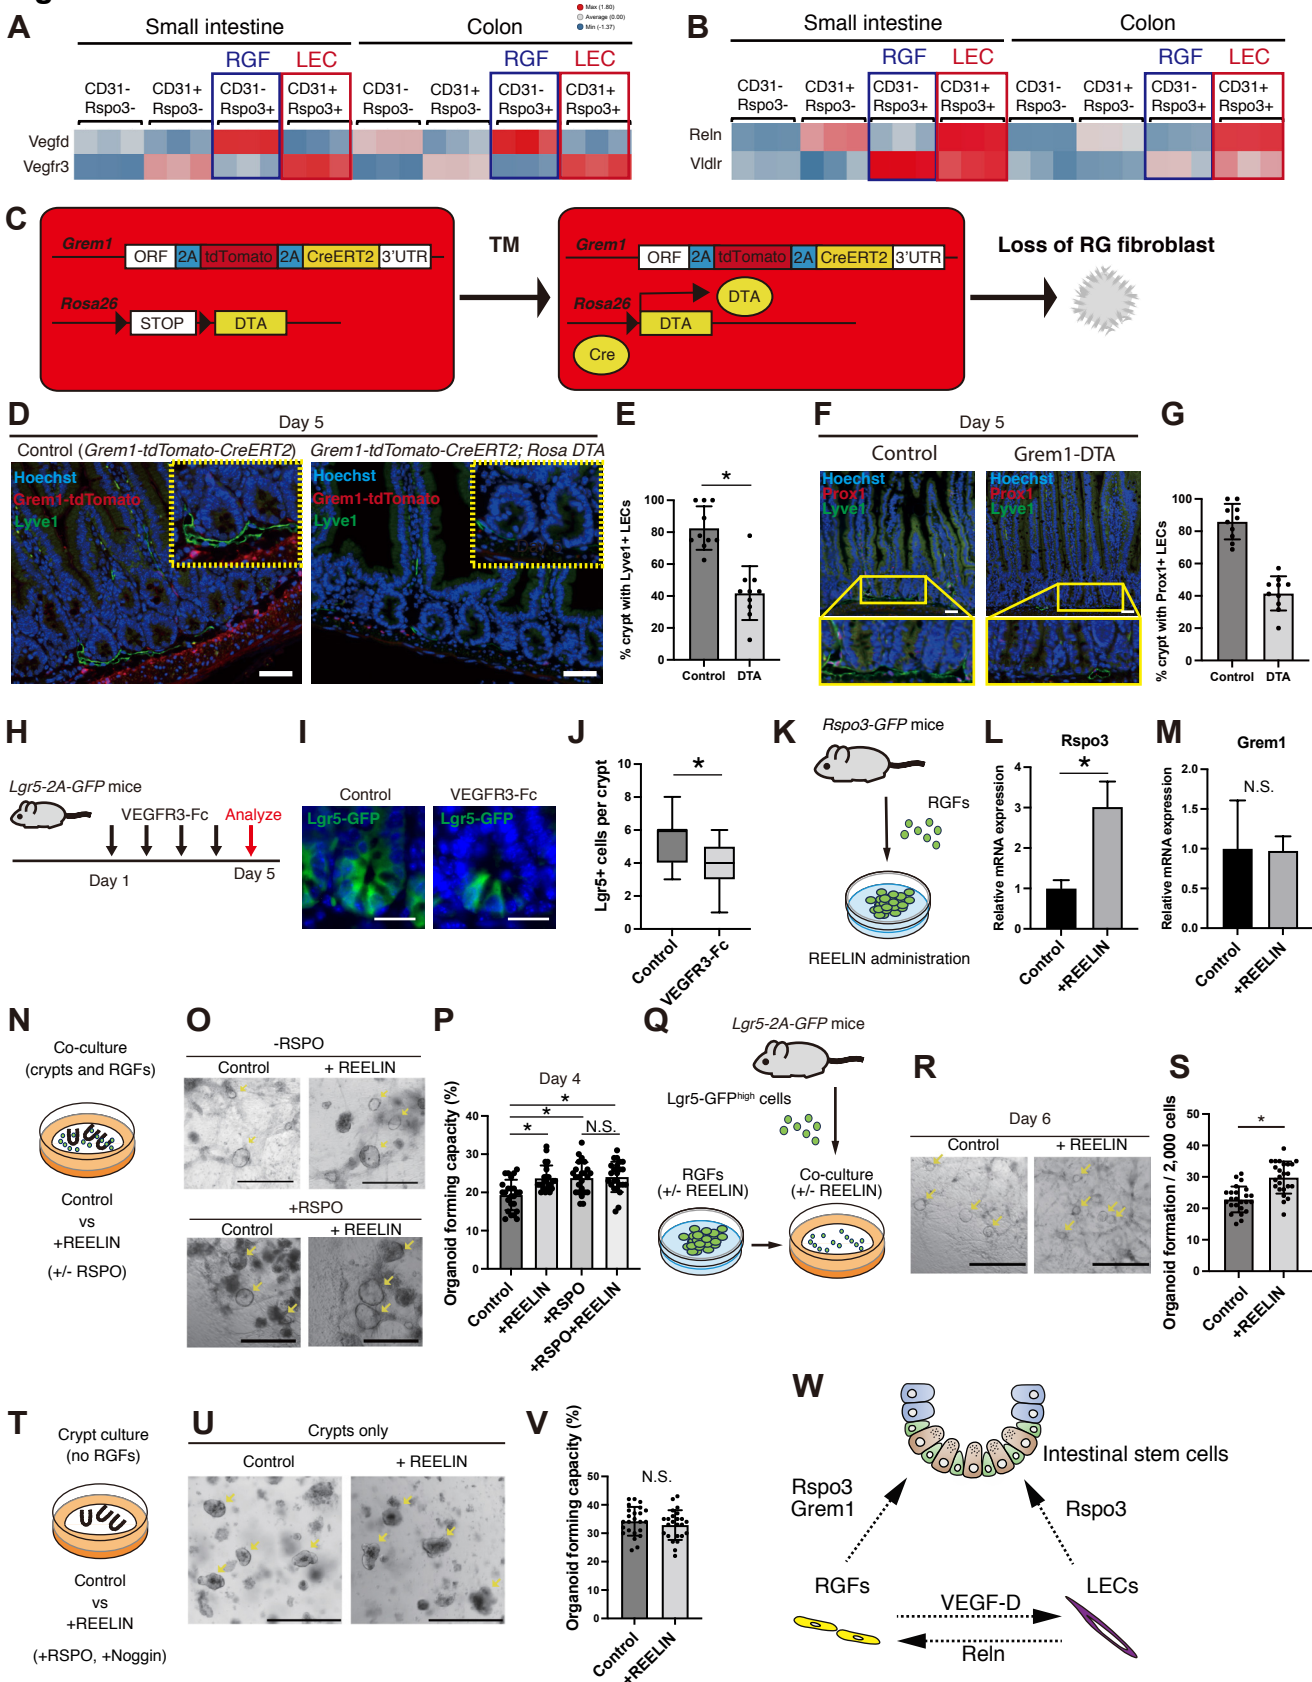

## Figure S6. Cross-regulation between RGFs and LECs, Related to Figure 5

(A-B) Heatmap of RNA-seq on CD31-*Rspo3*-GFP-, CD31+*Rspo3*-GFP-, CD31-*Rspo3*-GFP+, and CD31+*Rspo3*-GFP+ cells in the small intestine and colon. RGFs express *Vegfd*; LECs express its receptor (*Vegfr3*) (A). LECs express *Reln*; RGFs express its receptor (*Vldlr*) (B). n = 3 mice per group.

(C) Schematic for RG fibroblast ablation experiment.

(D-G) Immunofluorescence for *Grem1*-tdTomato and LYVE1 (D), Prox1 and LYVE1 (F) and the percentage of crypts with LYVE+ LECs (E) or Prox1+ LECs (G) in *Grem1*-tdTomato-*CreERT2* (control) and *Grem1*-tdTomato-*CreERT2*; *Rosa DTA* mice. n = 10.

(H) Schematic for soluble VEGFR3 receptor administration experiment.

(I-J) Representative images (I) and quantification (J) of *Lgr5*-GFP+ cells after soluble VEGFR3 receptor administration. n = 50 crypts from 4 mice per group.

(K) Schematic for the treatment of RGF culture with REELIN.

(L-M) qRT-PCR of *Rspo3* and *Grem1* in RGFs after REELIN treatment. n = 6 and n = 3, respectively.

(N) Schematic of REELIN treatment to the co-culture of crypts and RGFs in media with/without RSPO.

(O-P) Representative images (O) and quantification of organoid forming capacity (P) in the co-culture of crypts and RGFs in media with/without REELIN and with/without RSPO. n = 24 from 3 mice per group.

(Q) Schematic of co-culture experiments of sorted *Lgr5*-GFP<sup>high</sup> ISCs and REELIN-pretreated RGFs.

(R-S) *Lgr5*-GFP<sup>high</sup> ISC-derived organoid formation is modestly elevated when RGFs were pretreated with REELIN. Representative images (R) and quantification (S). n = 24 from 3 mice per group.

(T) Schematic of REELIN treatment to crypt culture.

(U-V) Representative images (U) and quantification of organoid forming capacity (V) in the crypt culture with Noggin and RSPO supplementation with or without REELIN administration. n = 24 from 3 mice per group.

(W) Schematic of proposed cross-regulation between RGFs and LECs.

Unpaired two-tailed t-tests (E, G, J, L, M, S, V). One-way ANOVA (P). Data are mean  $\pm$  SD (E, G, P, S, V) and mean  $\pm$  SEM (L, M). For box-and-whisker plots (J), data were expressed as box-and-whisker from the minimum to the maximum. \*p < 0.05. N.S. not significant. Scale bar, 50  $\mu$ m (D, F, I), 20  $\mu$ m (O, R, U).

**Figure S7**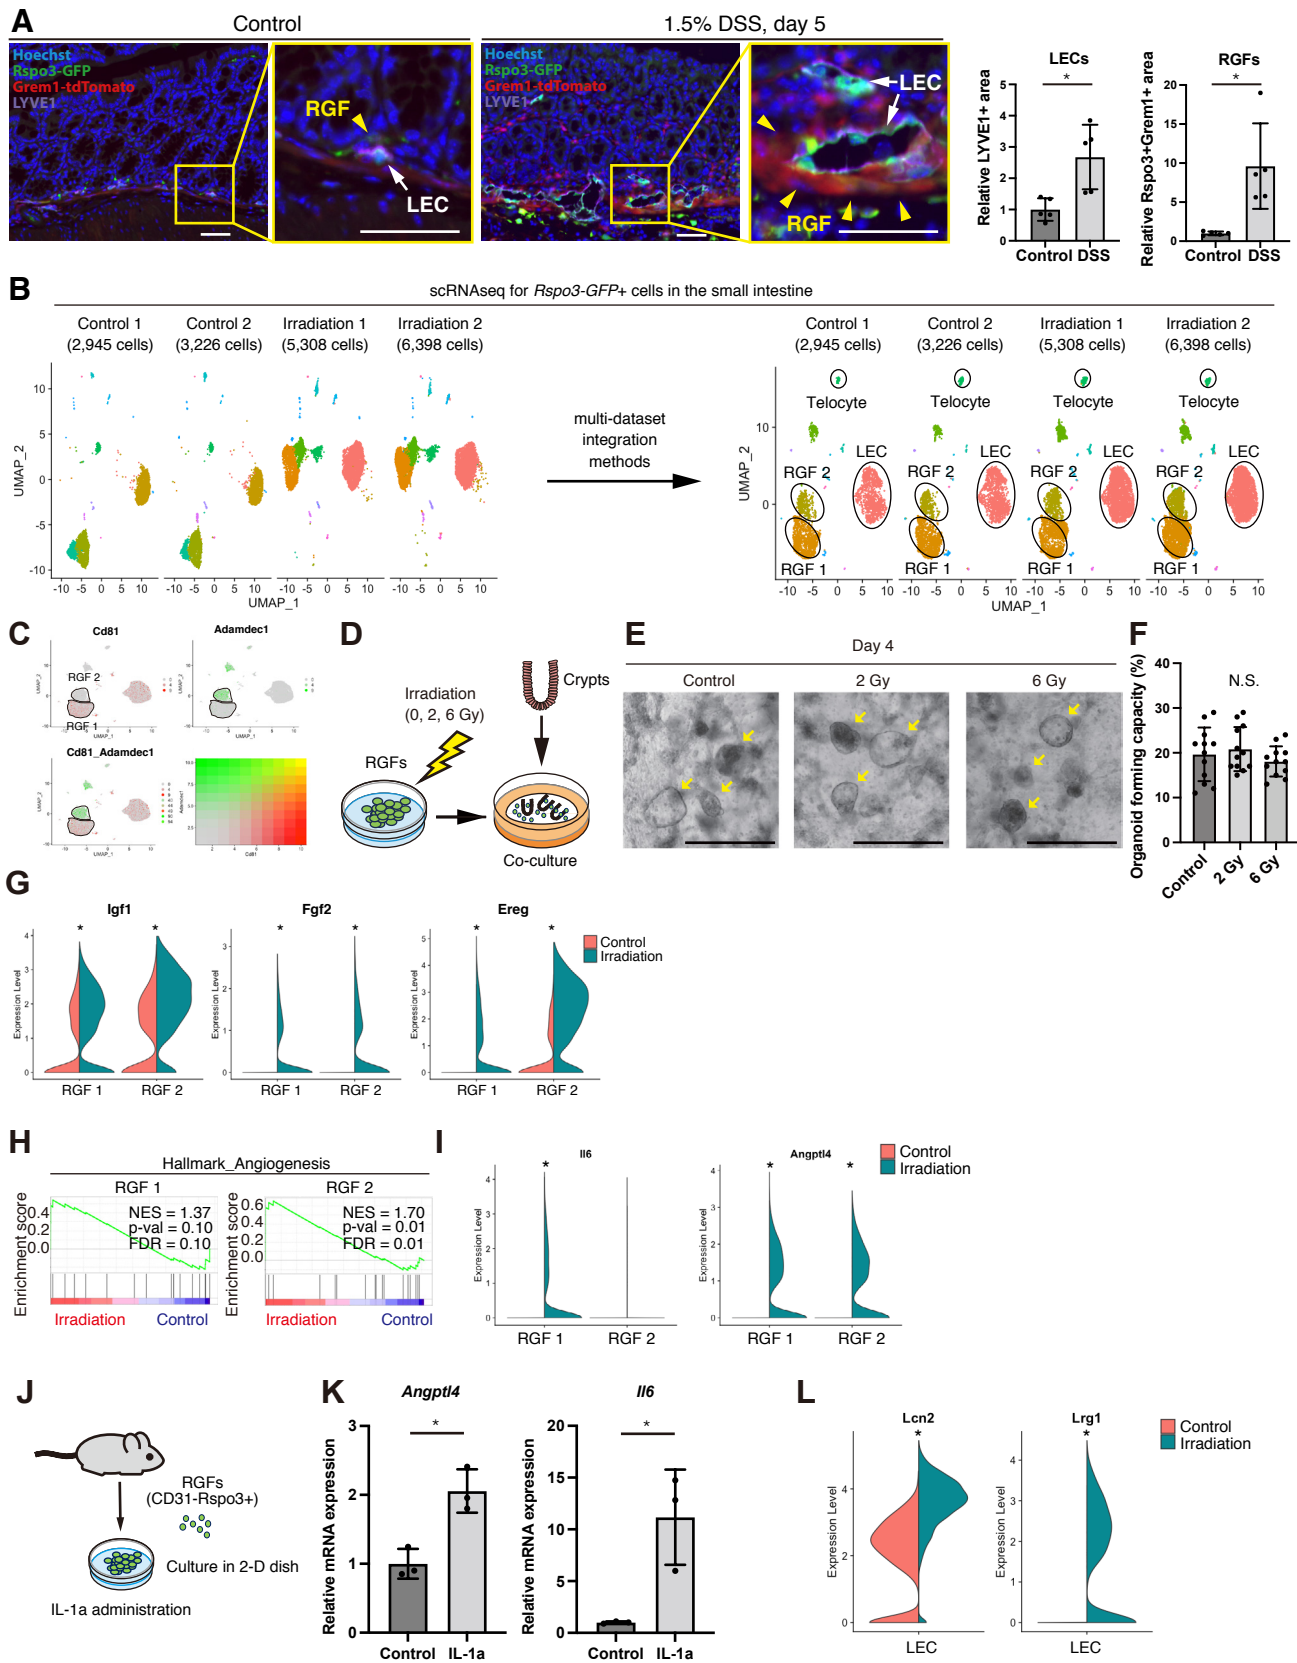

**Figure S7. Roles of LECs and RGFs in normal homeostasis and regeneration after injury, Related to Figure 6 and Figure 7**

(A) Immunofluorescence for *Rspo3-GFP*, *Grem1-tdTomato*, and LYVE1 in the DSS-induced colitis model at day 6 of 1.5% DSS administration. Yellow arrowheads indicate RGFs. White arrows indicate LECs. LYVE1+ areas (LECs) and *Rspo3-GFP+Grem1-tdTomato+* areas (RGFs) were quantified. (n = 5 fields from 3 mice per group)

(B) Individual UMAP plots of scRNA-seq of small intestinal *Rspo3-GFP+* cells 3 days post-irradiation before (left) and after (right) applying multi-dataset integration methods (Control, n = 2 mice (2,945 cells and 3,226 cells); irradiation, n = 2 mice (5,308 cells and 6,398 cells)).

(C) Relative expression of *Cd81* and *Adamdec1* onto the UMAP plot of *Rspo3-GFP+* cells from both control and irradiation mice. n = 17,877 cells from 4 mice.

(D) Schematic of co-culture experiments post-irradiation.

(E-F) Representative images (E) and quantification of organoids (F) at day 4 of co-culture of irradiated RGFs and crypts. n = 12 from 3 mice per group.

(G) Violin plots for *Igf1*, *Fgf2*, and *Ereg* expressions.

(H) GSEA of HALLMARK Angiogenesis genes in irradiation vs control mice from RGF 1 cluster (left) and RGF 2 cluster (right) of scRNA-seq.

(I) Violin plots for *Il6* and *Angptl4* expressions.

(J) Schematic for the treatment of RGF culture with IL-1a. Adapted from Figure 7I.

(K) qRT-PCR of *Il6* and *Angptl4* mRNA expressions from RGFs 24 hours after IL-1a treatment. n = 3 mice per group.

(L) Violin plots for *Lcn2* and *Lrg1* expressions comparing control and irradiation mice in LEC cluster of scRNA-seq. One-way analysis of variance (ANOVA) with post-hoc Tukey's multiple comparison (F). Unpaired two-tailed t-tests (A, K). Wilcox test (G, I, L). Data are mean  $\pm$  SD. \*p < 0.05. N.S. not significant. Scale bar, 50  $\mu$ m (A), 20  $\mu$ m (E).
